# Supplementary material for: Statistical Copolymers of N–Vinylpyrrolidone and 2–Chloroethyl Vinyl Ether via Radical RAFT Polymerization: Monomer Reactivity Ratios, Thermal Properties, and Kinetics of Thermal Decomposition of the Statistical Copolymers
Source: MDPI journal article supplement (doi:10.3390/polym15081970), 2023-04-21
Supplement: s1 [file s1]

# **Statistical Copolymers of *N*-Vinylpyrrolidone and 2-Chloroethyl Vinyl Ether via Radical RAFT Polymerization: Monomer Reactivity Ratios, Thermal Properties, and Kinetics of Thermal Decomposition of the Statistical Copolymers**

**Nikolaos V. Plachouras and Marinos Pitsikalis \***

Industrial Chemistry Laboratory, Department of Chemistry, National and Kapodistrian University of Athens, Panepistimiopolis Zografou, 15771 Athens, Greece; plachouras.v.nikolaos@gmail.com  
Correspondence: pitsikalis@chem.uoa.gr

## **Supporting Information**

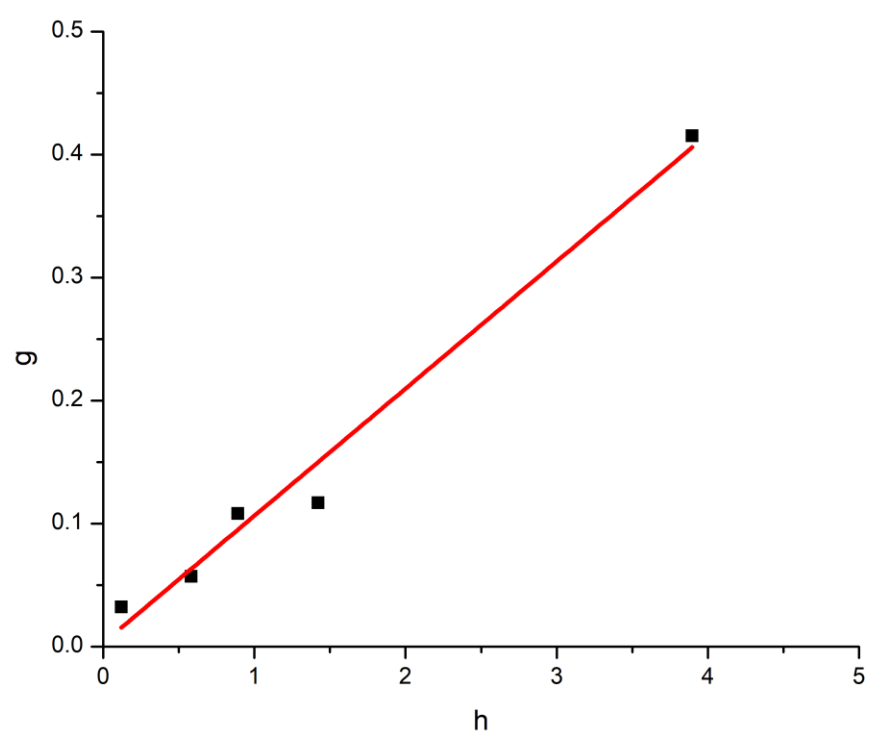

**Figure S1.** (F-R) plot of the P(NVP-stat-CEVE) copolymers.

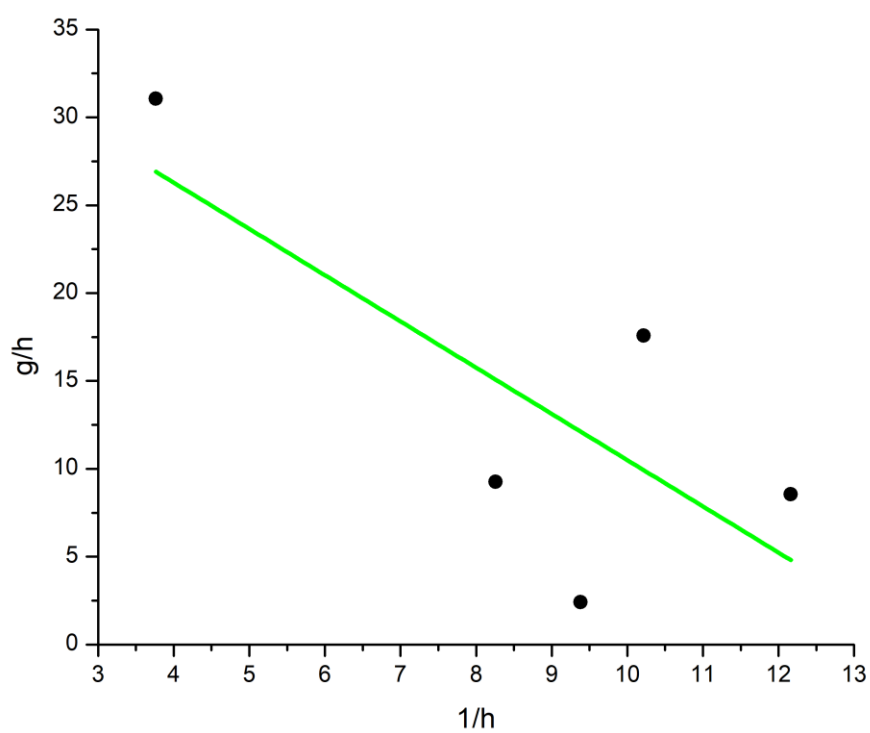

**Figure S2.** (inv. F-R) plot of the P(NVP-stat-CEVE) copolymers.

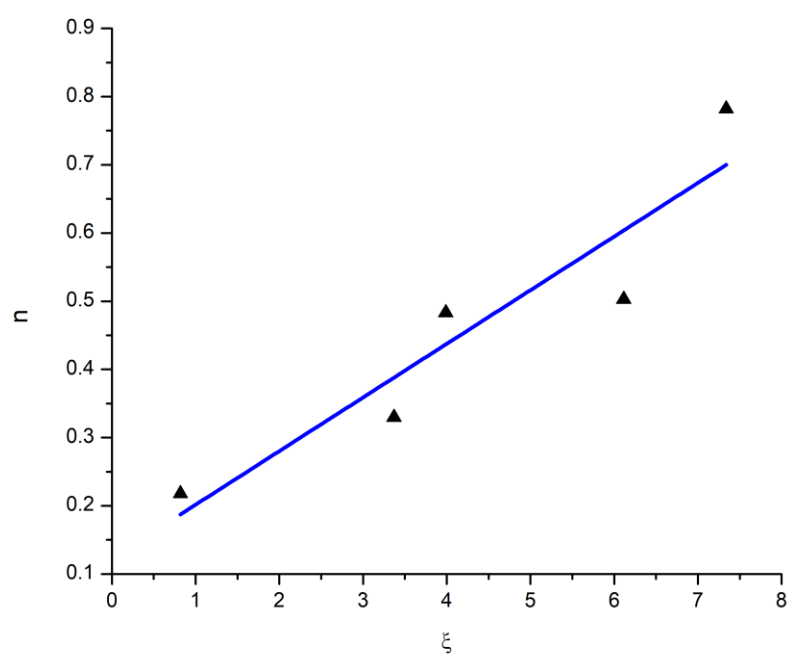

**Figure S3.** (K-T) plot of the P(NVP-stat-CEVE) copolymers.

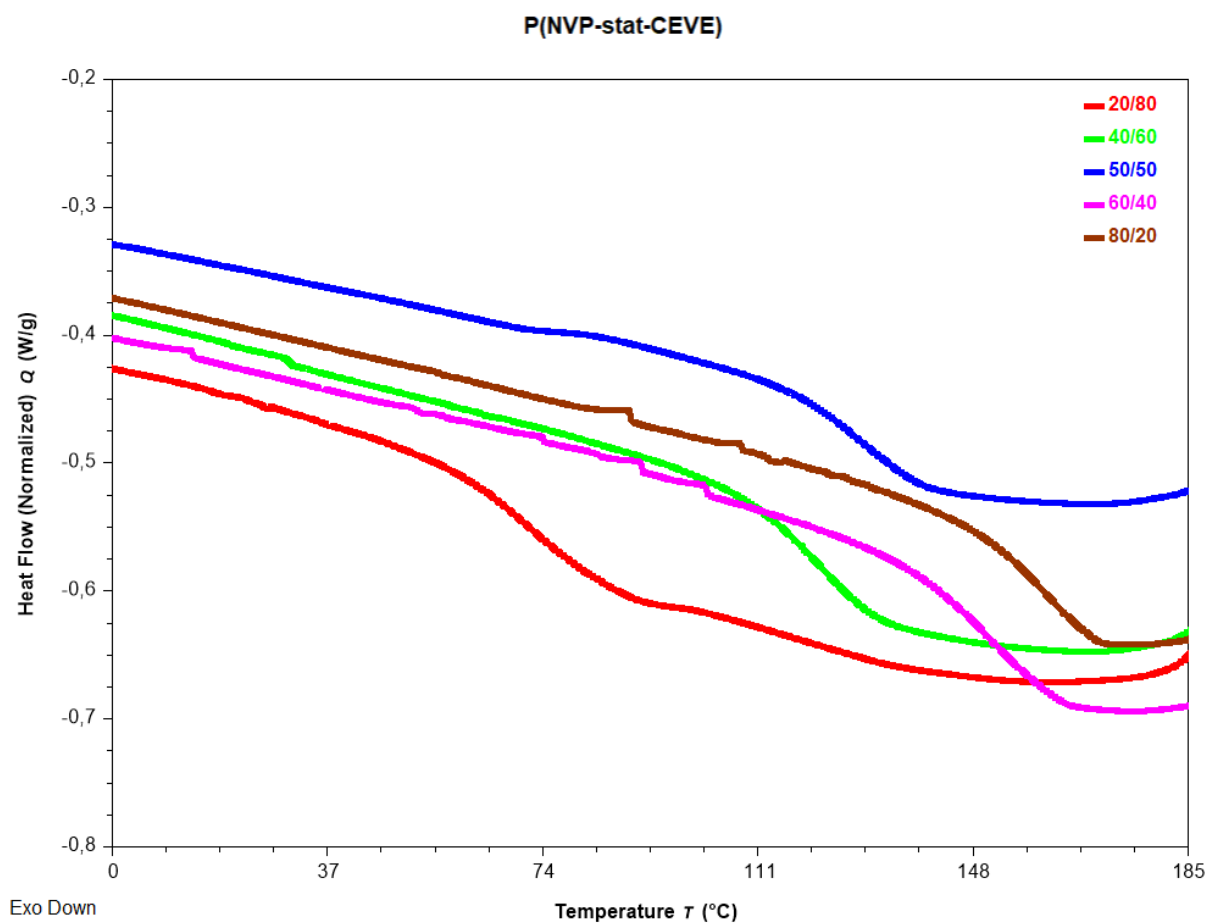

**Figure S4.** (DSC) thermograms for the P(NVP–stat–CEVE) copolymers.

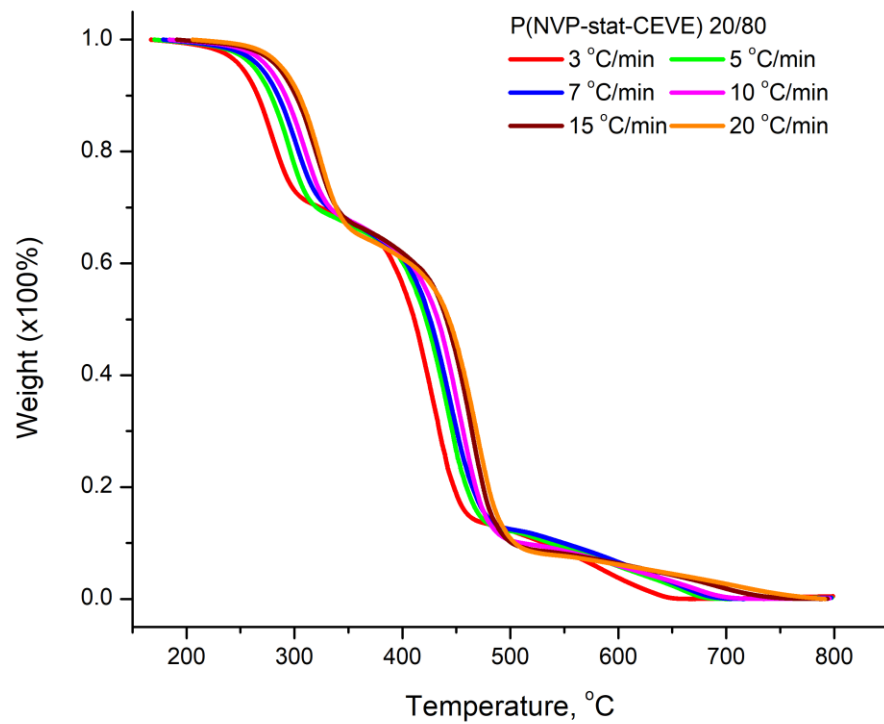

**Figure S5.** Weight loss with temperature under different heating rates for the P(NVP-stat-CEVE) 20/80.

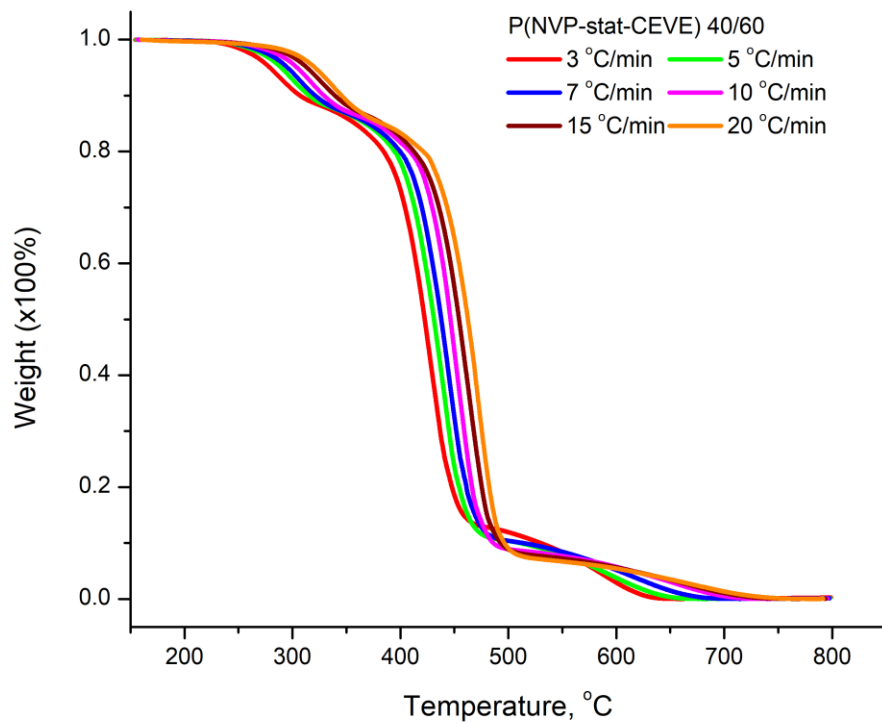

**Figure S6.** Weight loss with temperature under different heating rates for the P(NVP-stat-CEVE) 40/60.

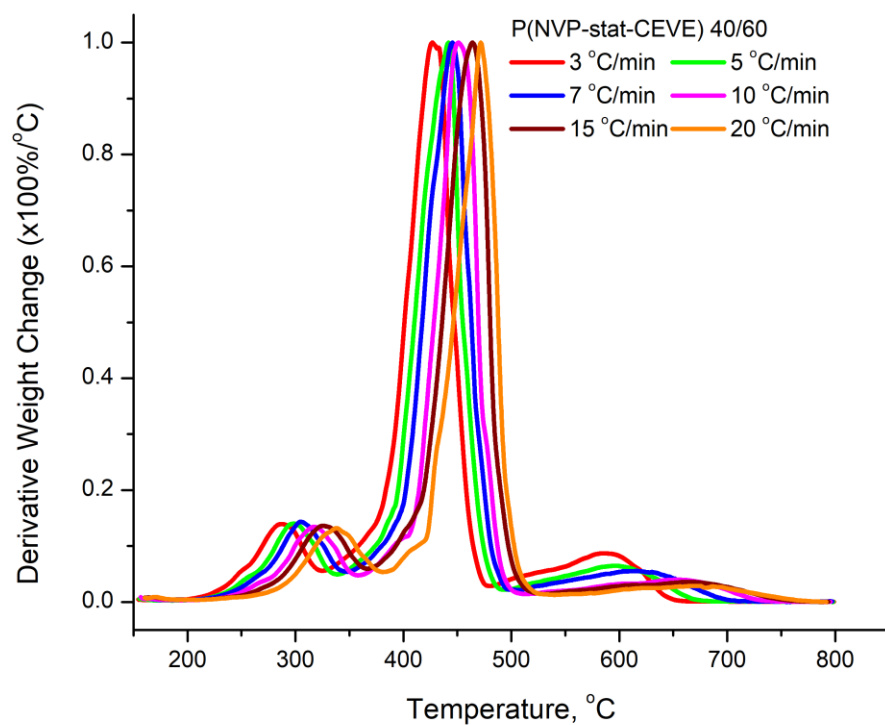

**Figure S7.** Derivative weight loss with temperature under different heating rates for the P(NVP-stat-CEVE) 40/60.

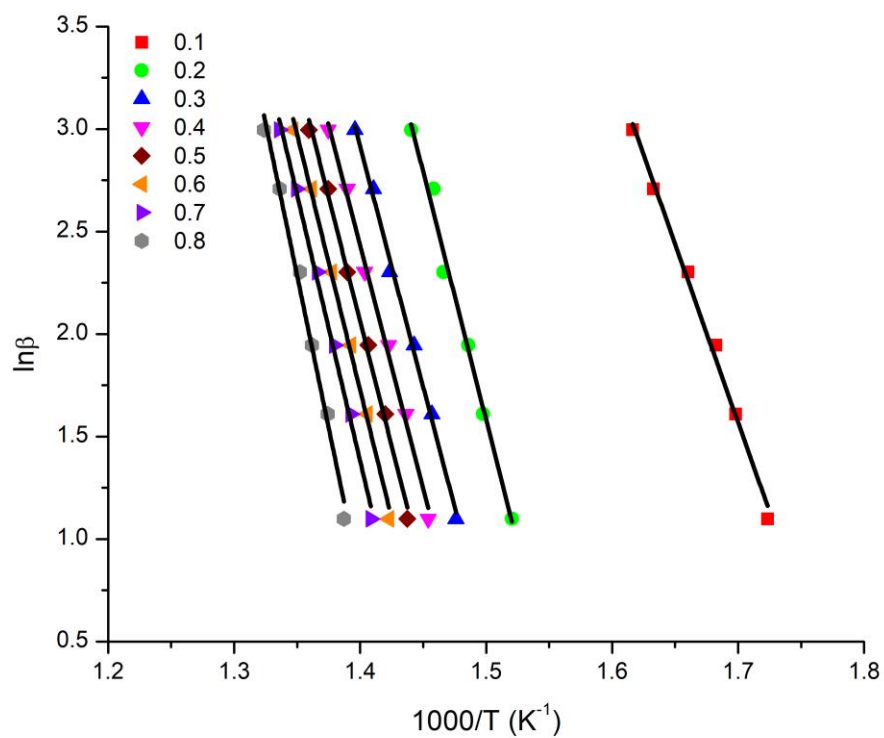

**Figure S8.** (OFW) plots for the sample P(NVP-stat-CEVE) 40/60.

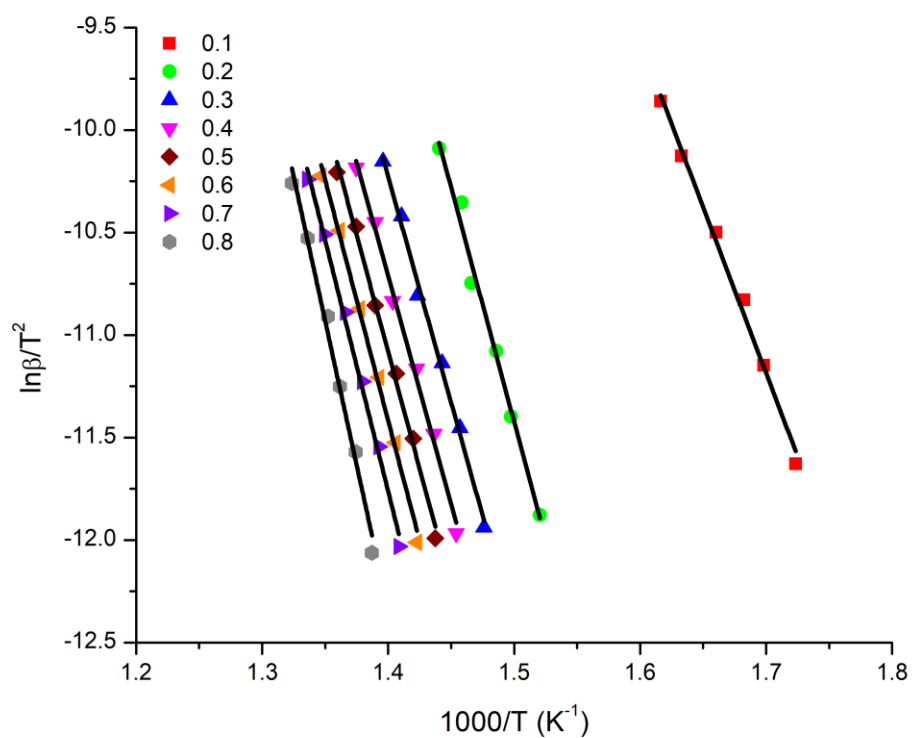

**Figure S9.** (KAS) plots for the sample P(NVP-stat-CEVE) 40/60.

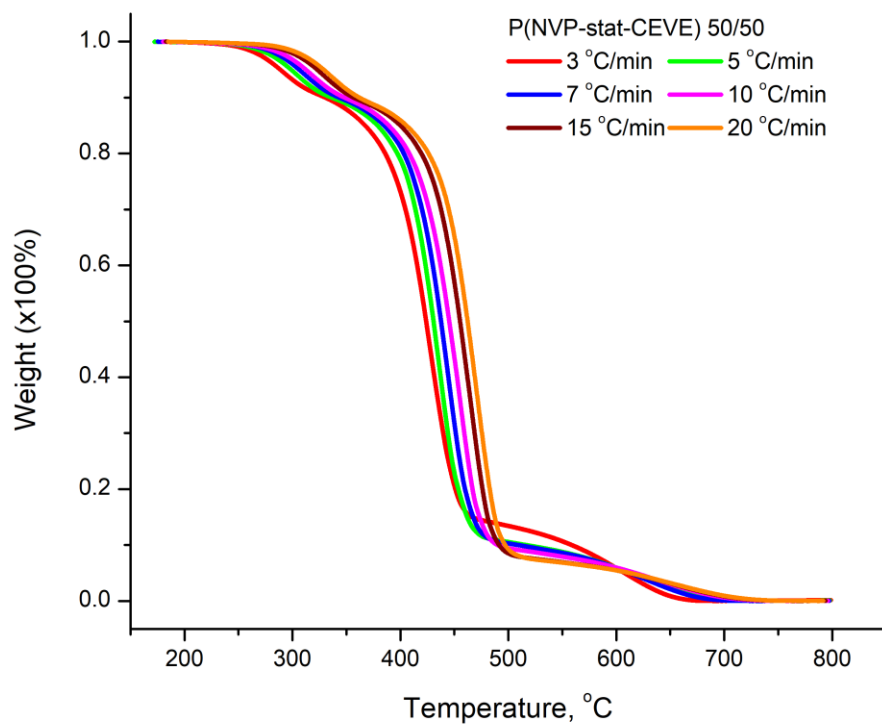

**Figure S10.** Weight loss with temperature under different heating rates for the P(NVP-stat-CEVE) 50/50.



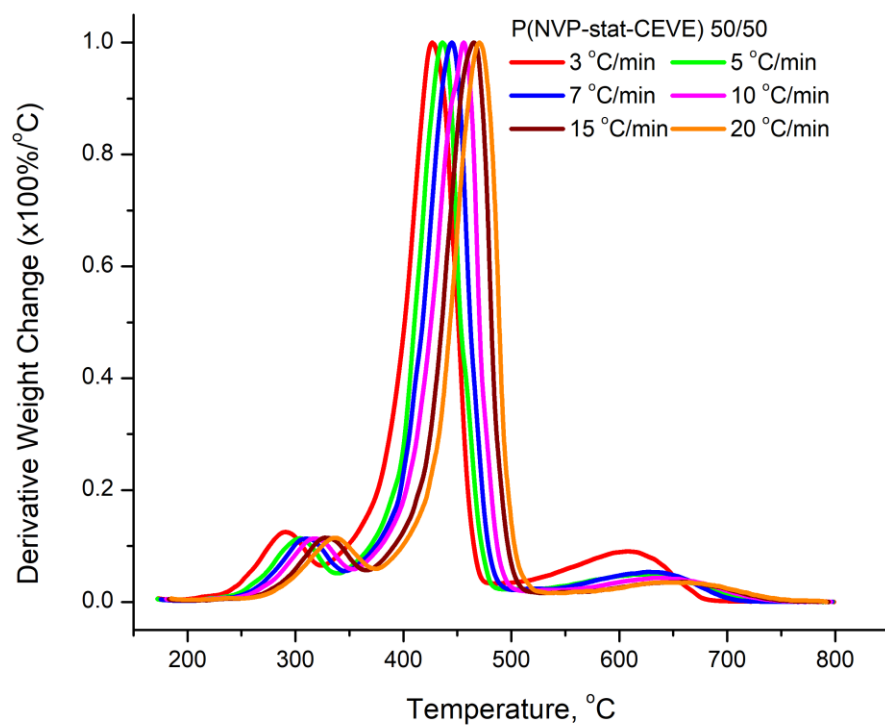

**Figure S11.** Derivative weight loss with temperature under different heating rates for the P(NVP-stat-CEVE) 50/50.

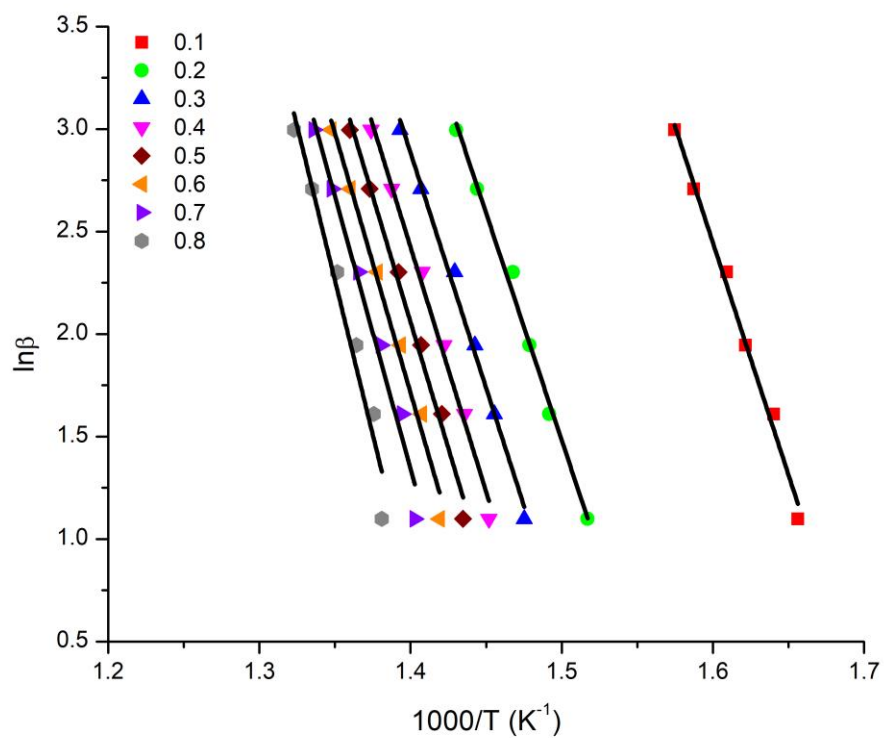

**Figure S12.** (OFW) plots for the sample P(NVP-stat-CEVE) 50/50.

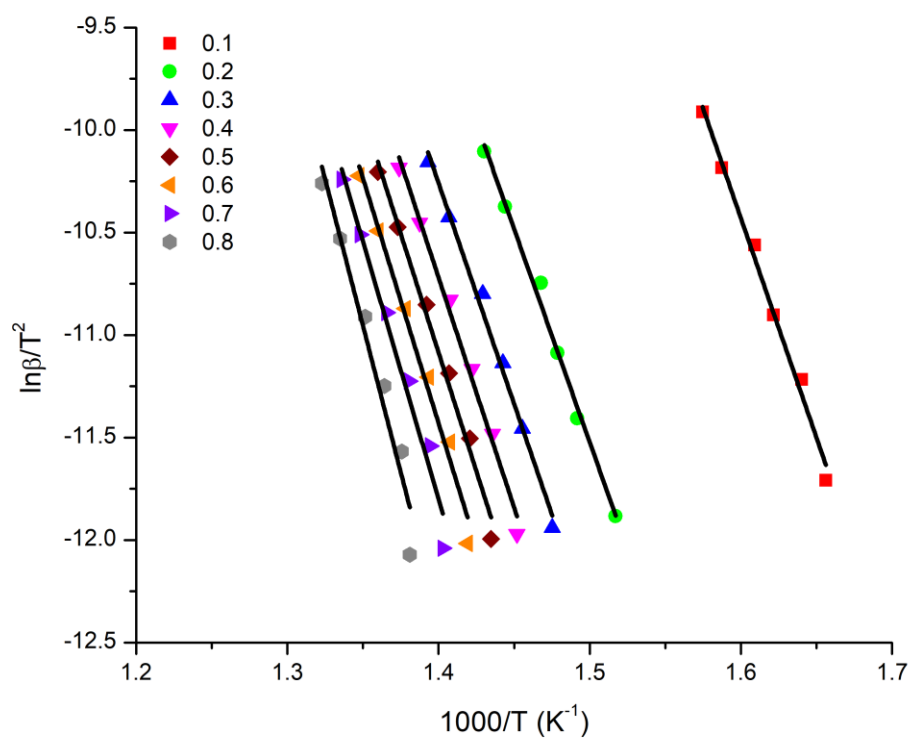

**Figure S13.** (KAS) plots for the sample P(NVP-stat-CEVE) 50/50.

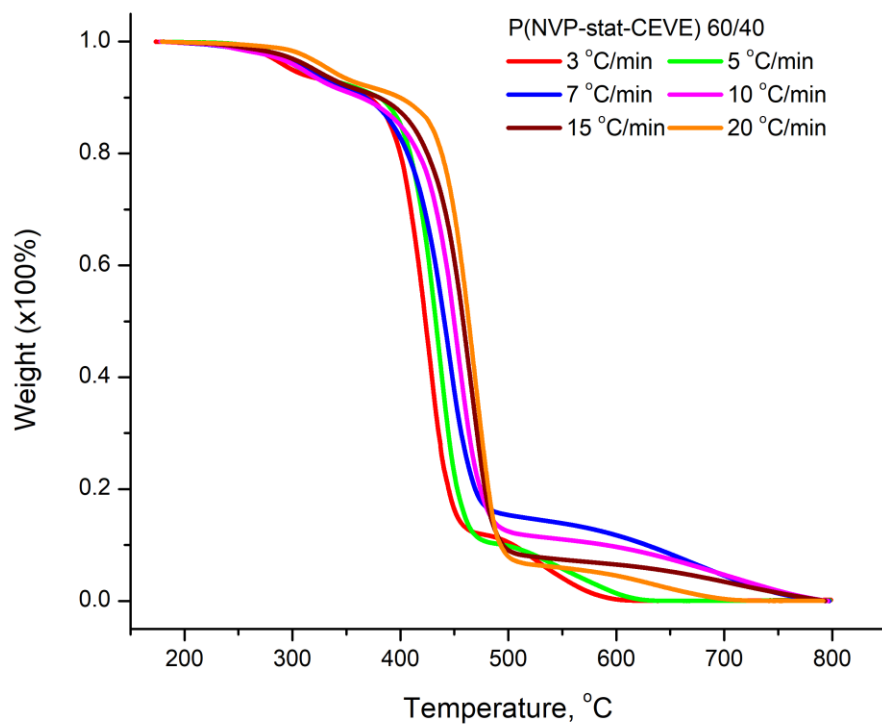

**Figure S14.** Weight loss with temperature under different heating rates for the P(NVP-stat-CEVE) 60/40.

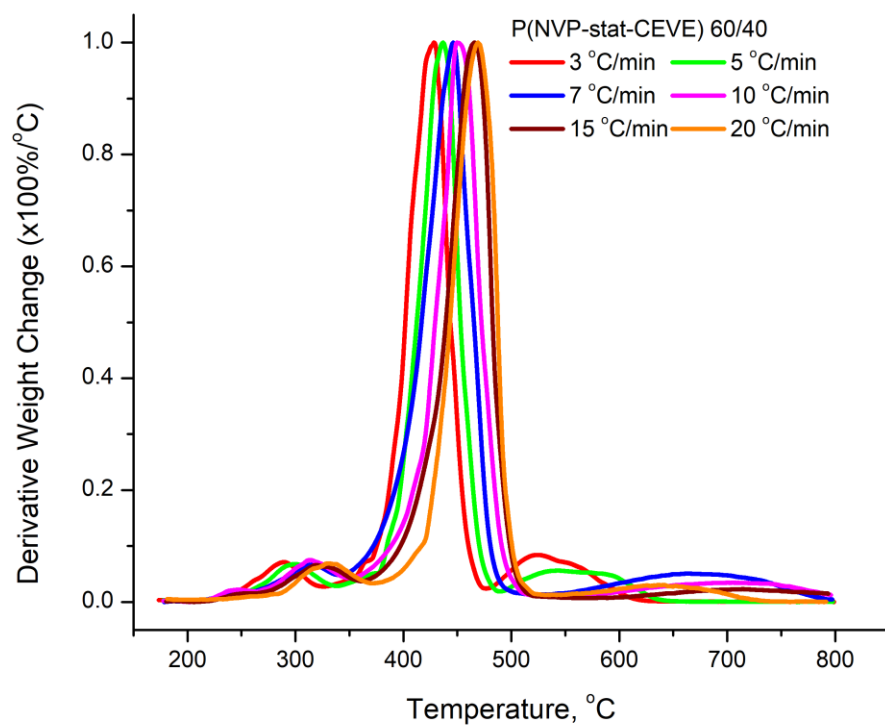

**Figure S15.** Derivative weight loss with temperature under different heating rates for the P(NVP–stat–CEVE) 60/40.

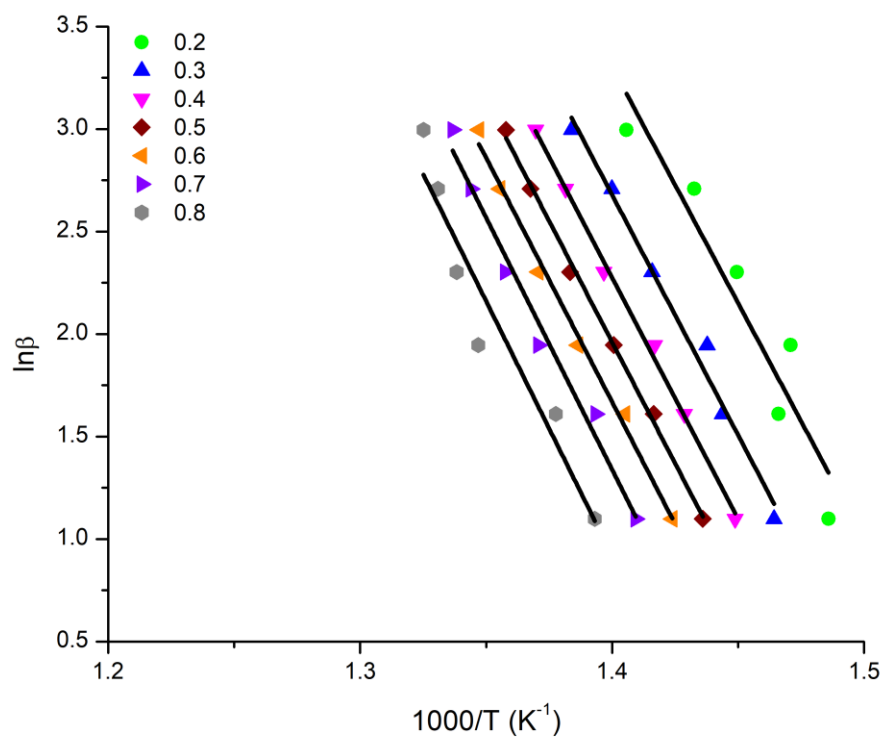

**Figure S16.** (OFW) plots for the sample P(NVP–stat–CEVE) 60/40.

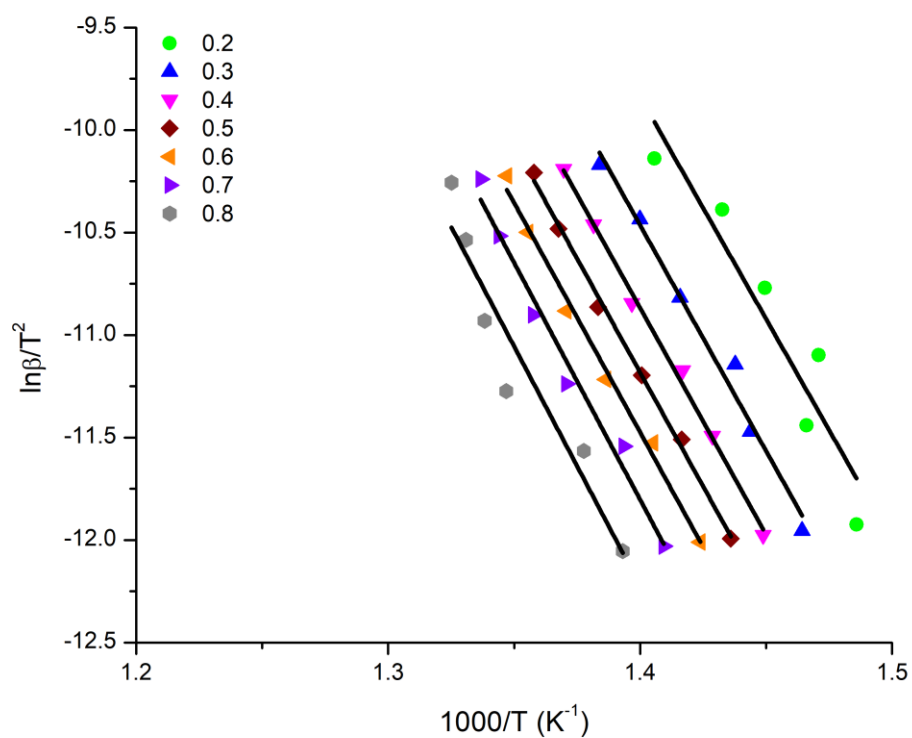

**Figure S17.** (KAS) plots for the sample P(NVP-stat-CEVE) 60/40.

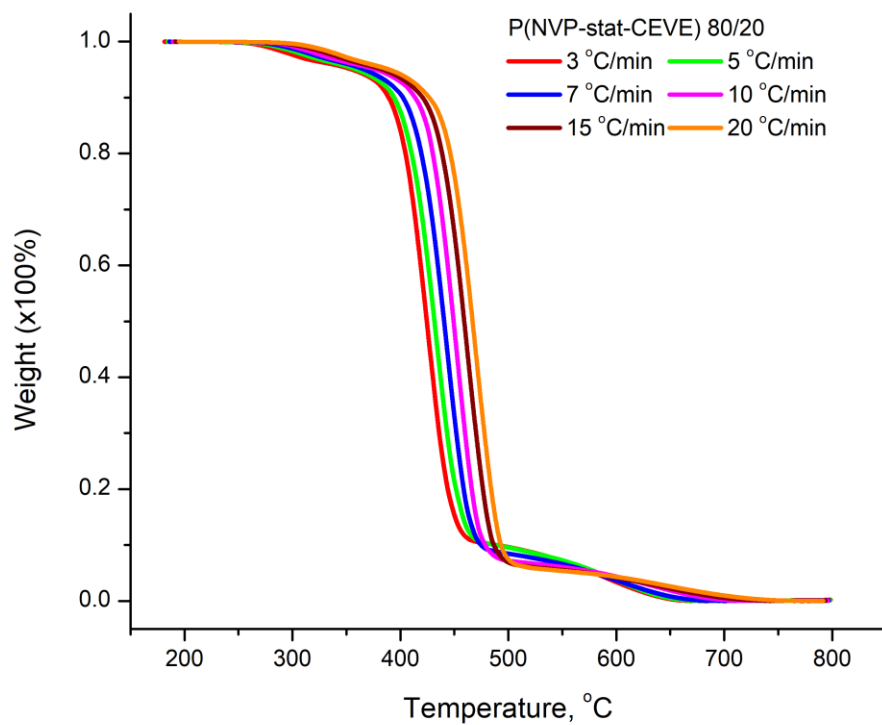

**Figure S18.** Weight loss with temperature under different heating rates for the P(NVP-stat-CEVE) 80/20.

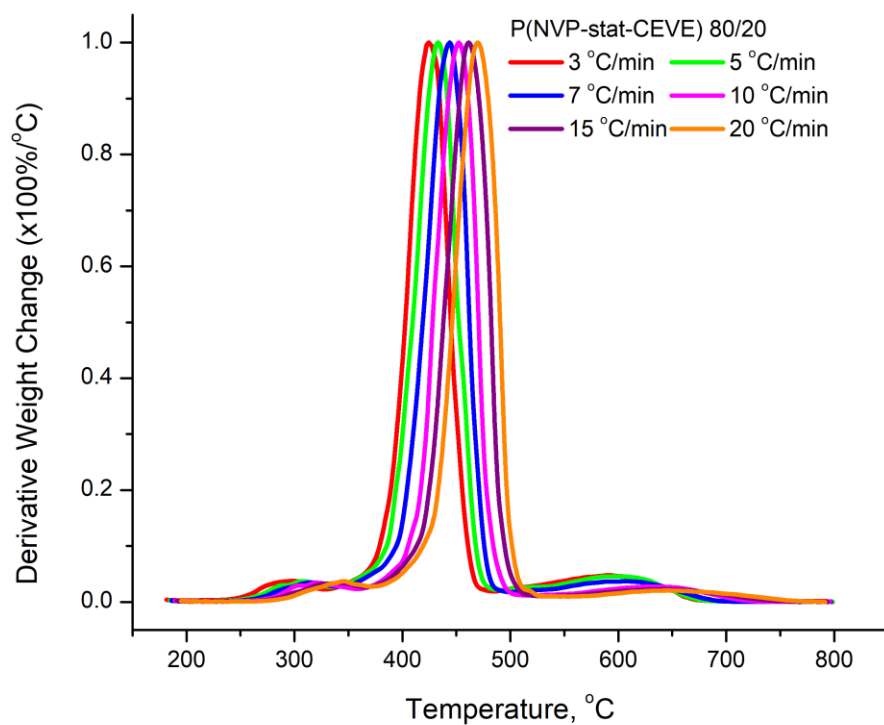

**Figure S19.** Derivative weight loss with temperature under different heating rates for the P(NVP-stat-CEVE) 80/20.

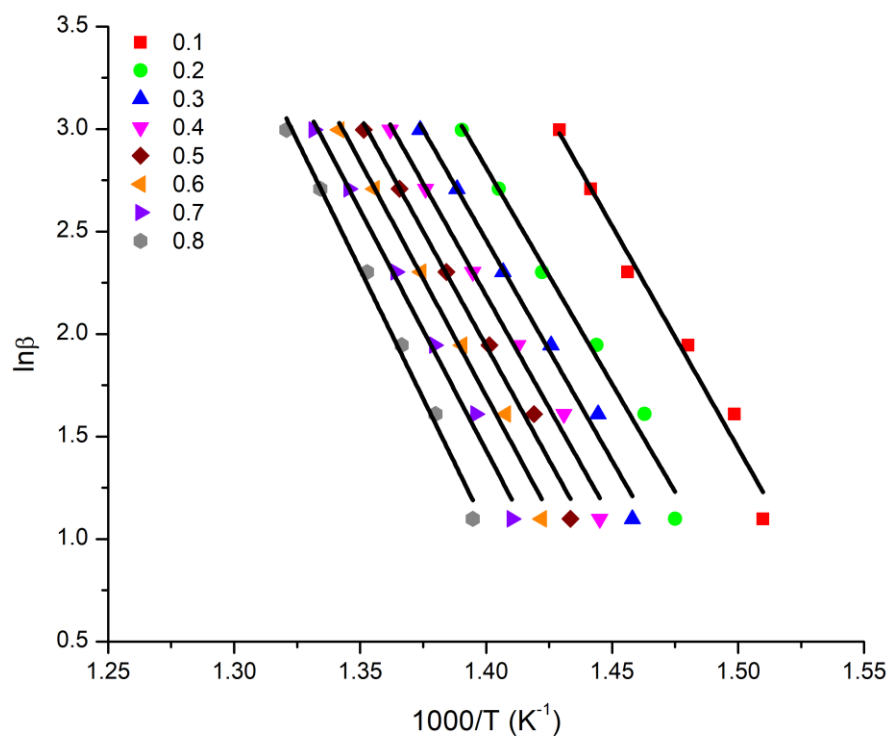

**Figure S20.** (OFW) plots for the sample P(NVP-stat-CEVE) 80/20.

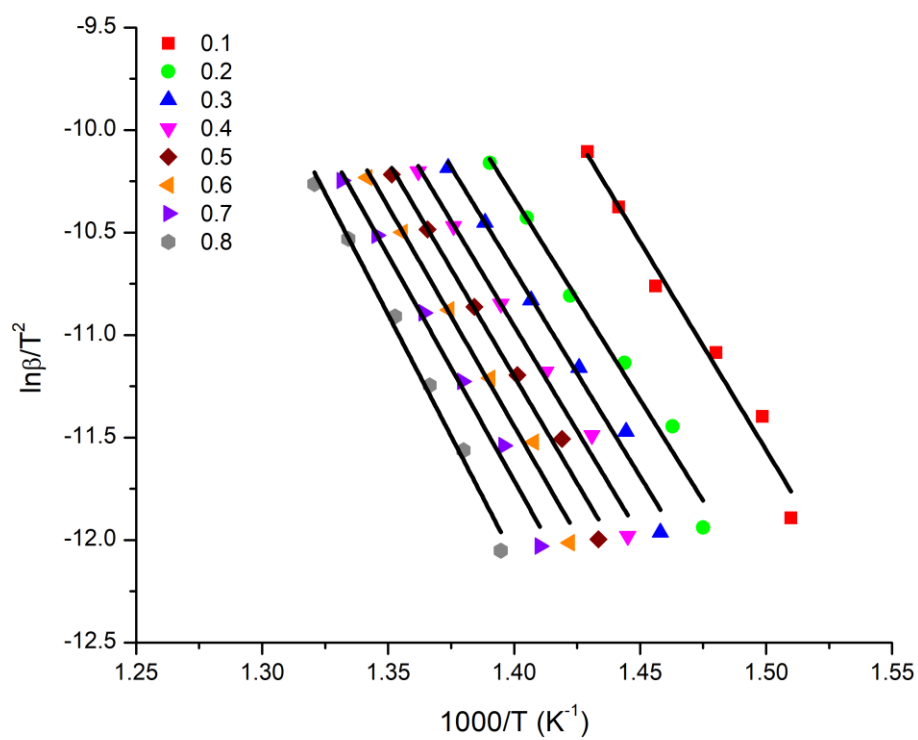

**Figure S21.** (KAS) plots for the sample P(NVP-stat-CEVE) 80/20.
